# Supplementary material for: Group I Intron as a Potential Target for Antifungal Compounds: Development of a Trans-Splicing High-Throughput Screening Strategy
Source: MDPI journal article supplement (doi:10.3390/molecules28114460), 2023-05-31
Supplement: s1 [file s1]

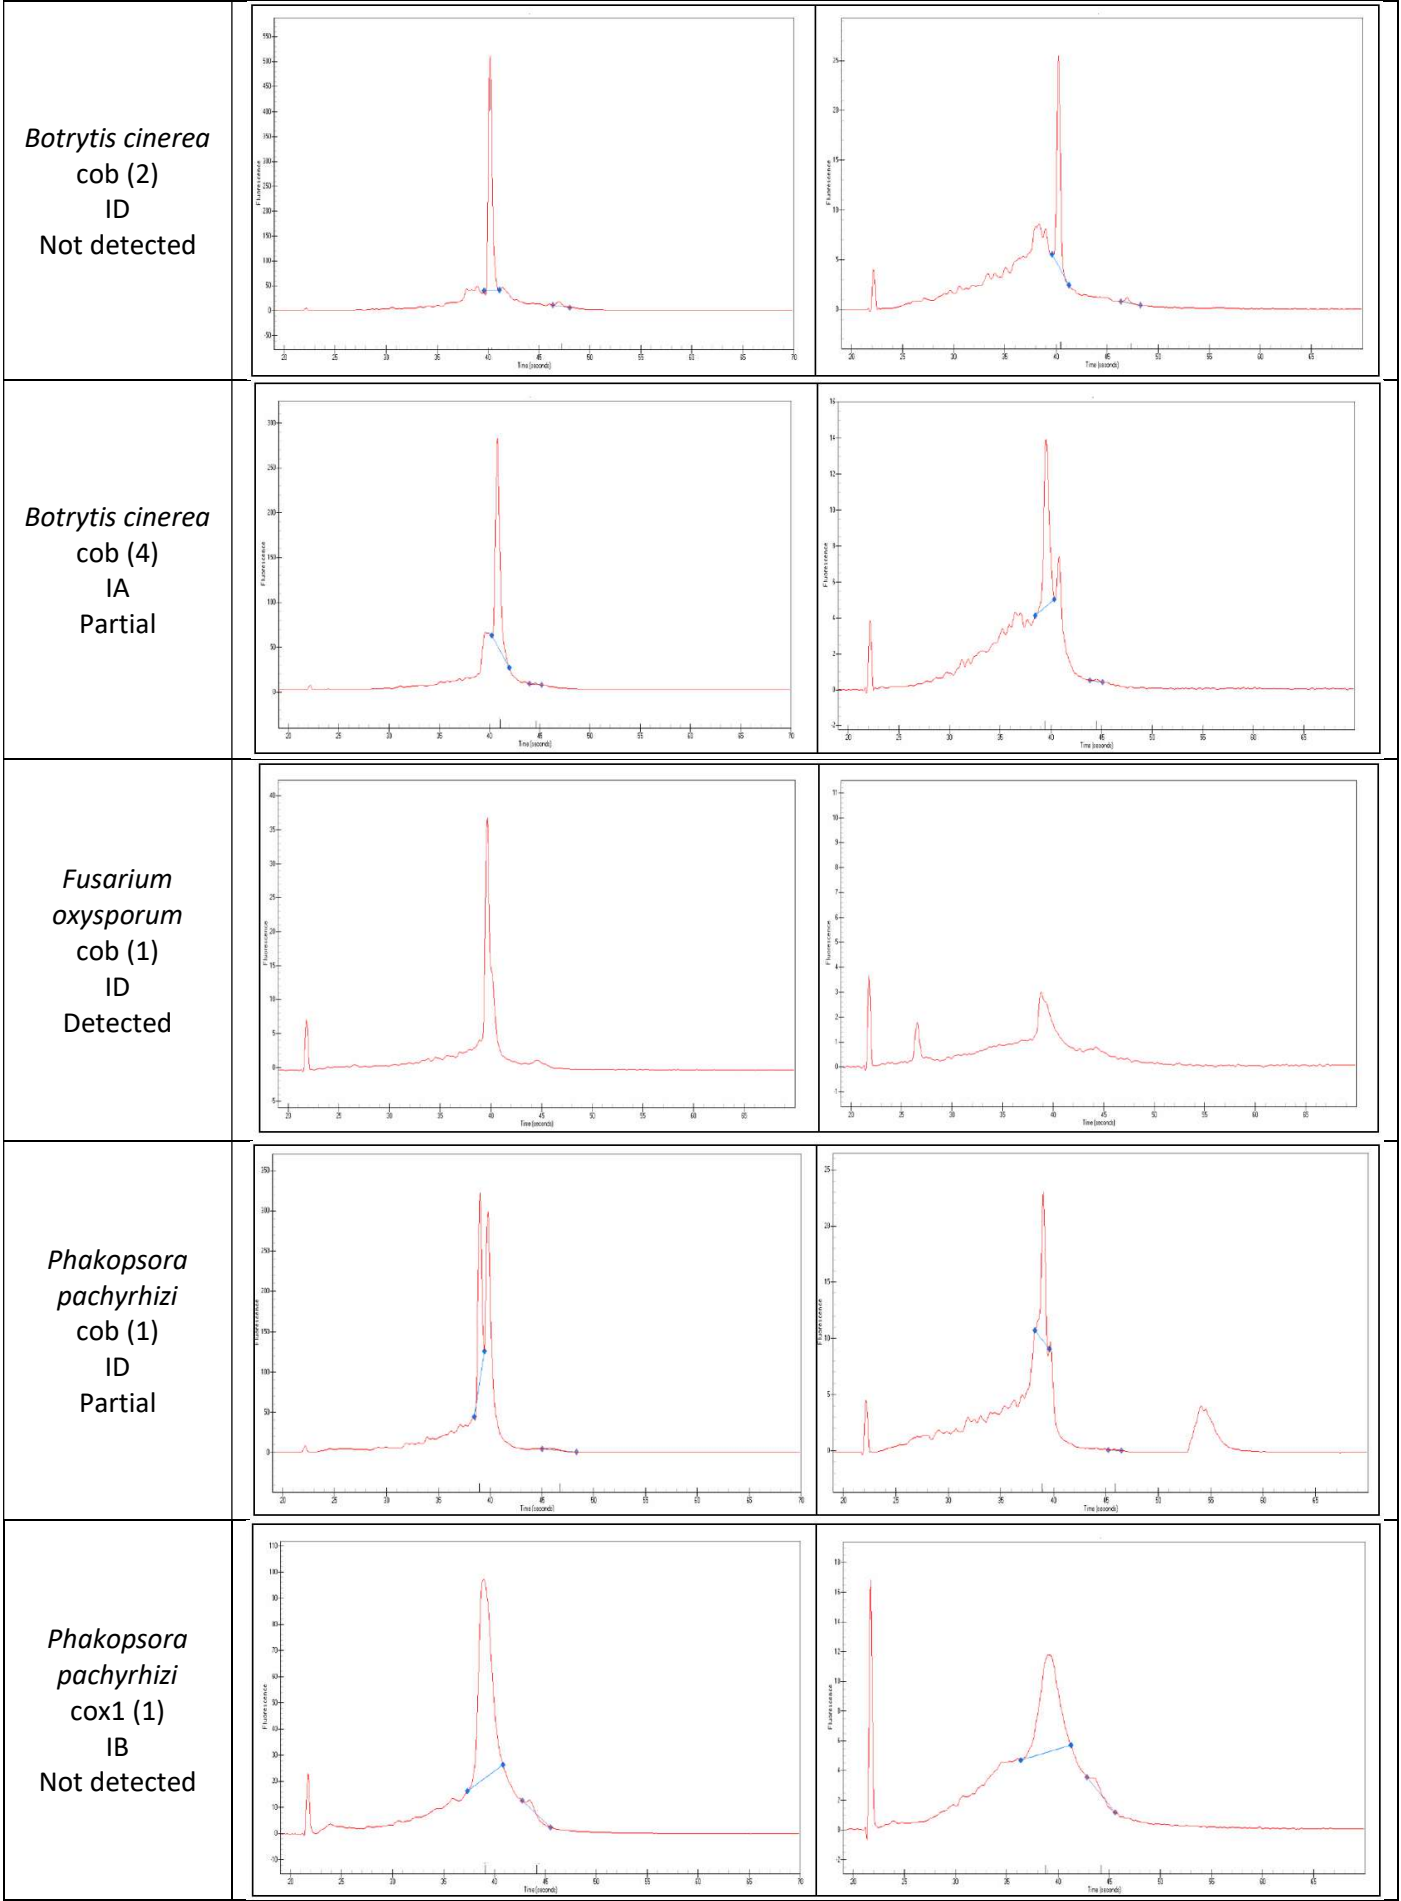

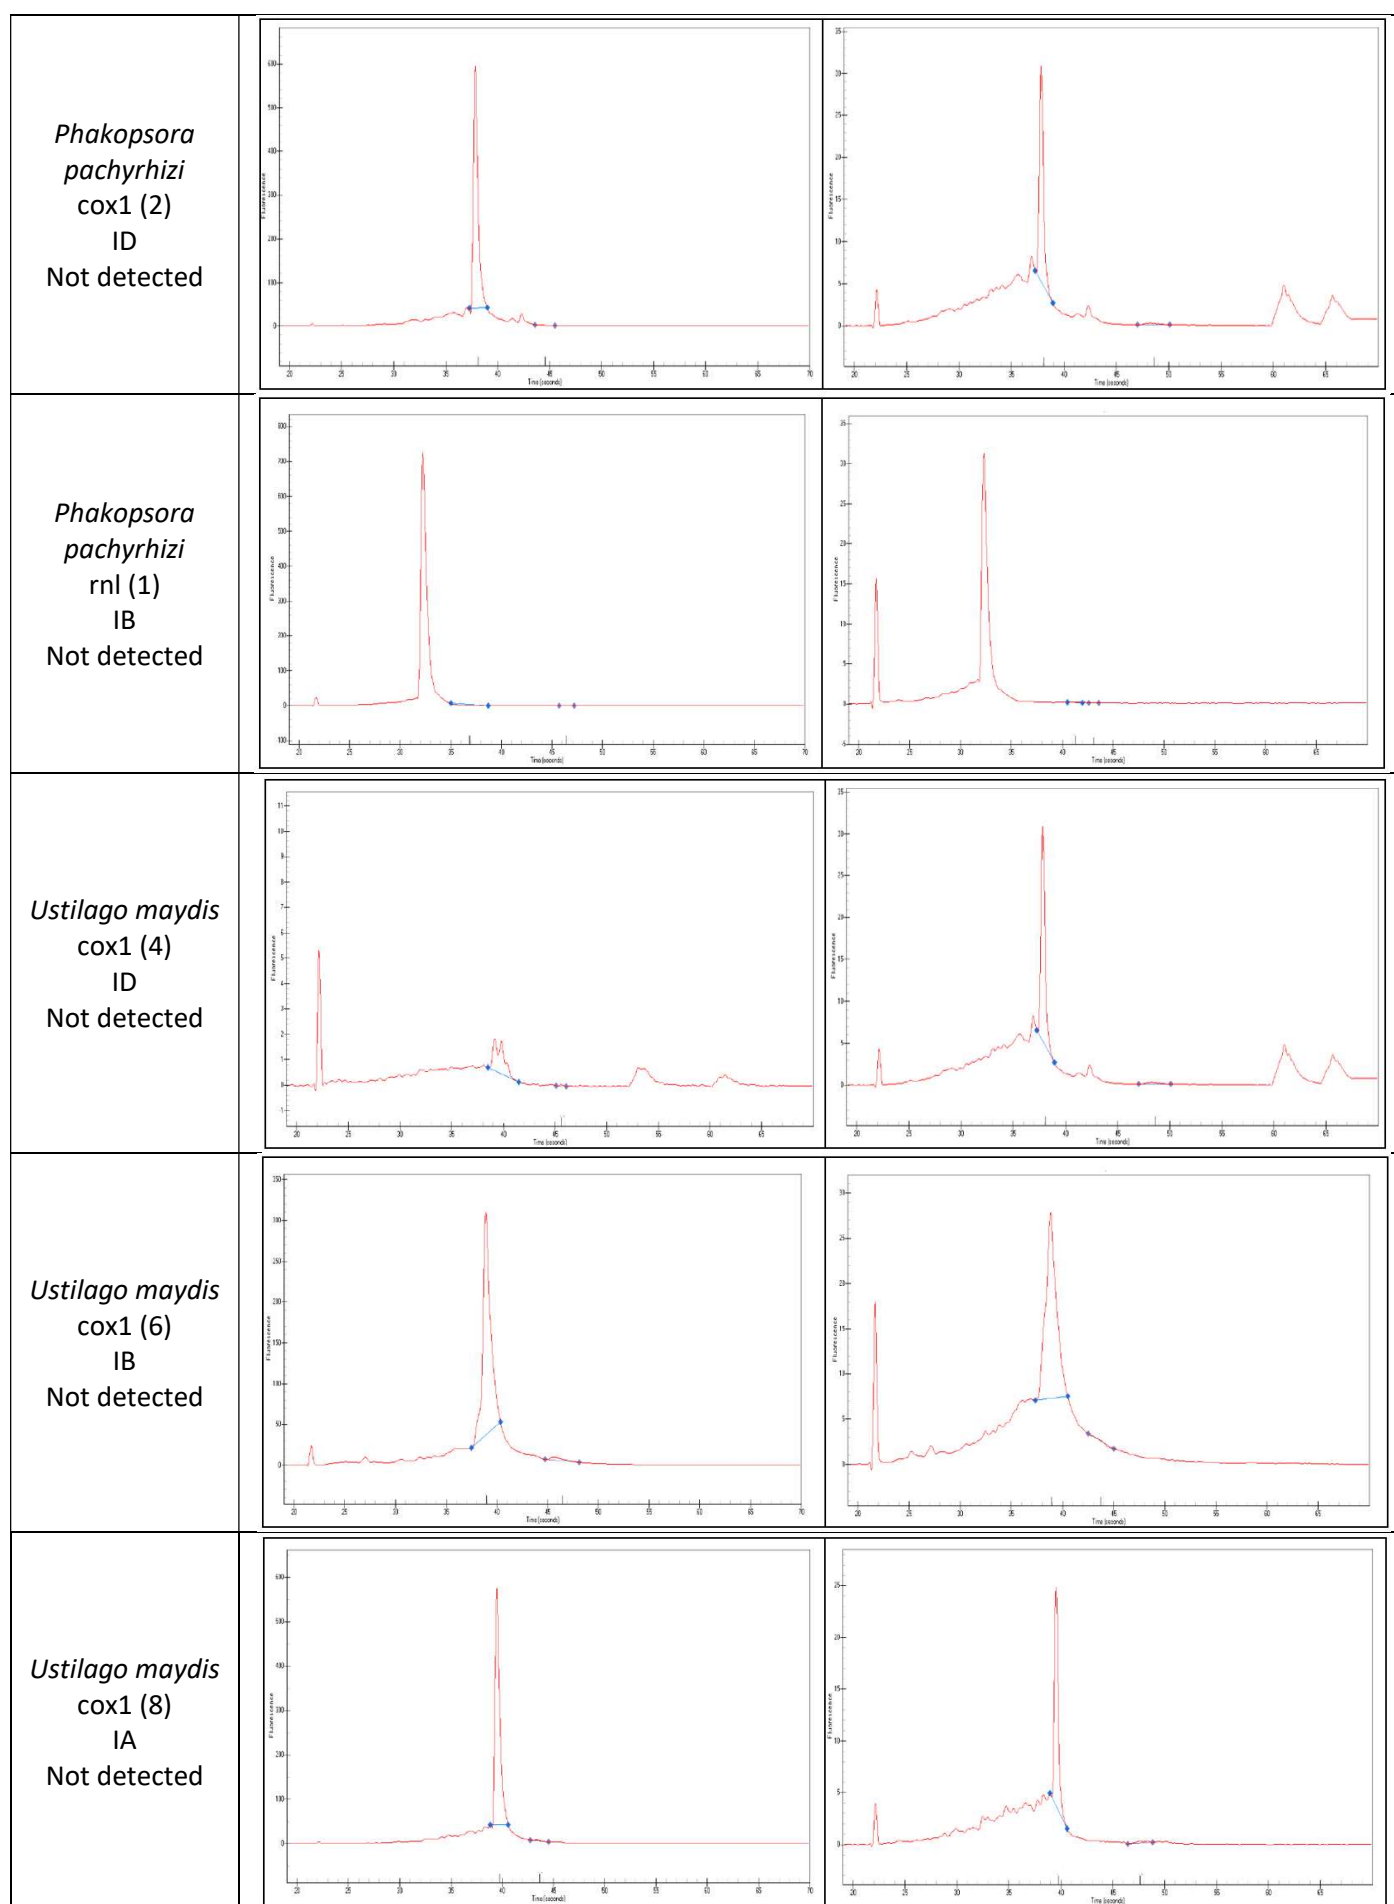

**Figure S1:** *In vitro* self-splicing activity of 10 fungal group I introns, assessed by automated electrophoresis (Experion). From left to right, before and after self-splicing reactions.

**A**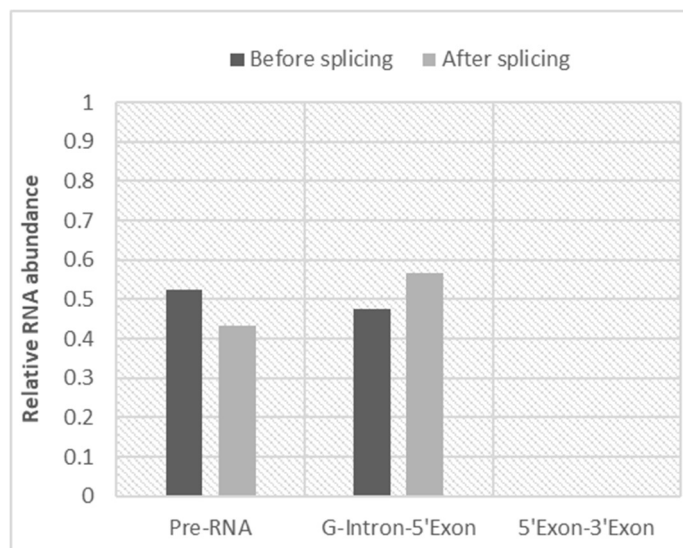**B**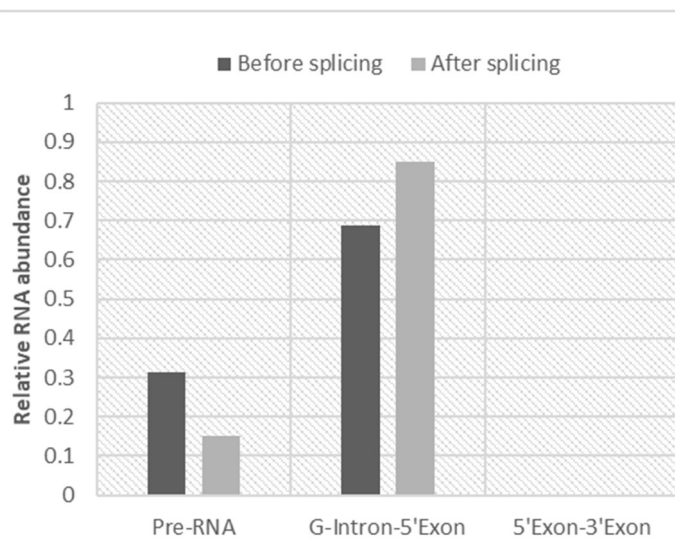

**Figure S2:** Quantitative Reverse Transcription PCR (qRT-PCR) of reaction products before and after splicing for (A) *Botrytis cinerea* cob (4) and (B) *Phakopsora pachyrhizi* cob (1). Representative result of three independent experiments, based on three technical replicates.

```

      *           *           *           *           *           *           *           *           *
1  gcaccaagaacattgacatgagttataggtacaataatccttatcggttatgatagttacaggattcctgggttatggtttaccttatggacaaatgtcat 100
   |||||
1  gaacc-----ttgacatgagttataggtacaataatccttatcggttatgatagttacaggattcctgggttatggtttaccttatggacaaatgtcat 93
      *           *           *           *           *           *           *           *           *

      *           *           *           *           *
101 tatgaggtgctacagttattactaatttaattagtgtctgttccttgaattgga 153
    |||||
94  tatgaggtgctacagtt 110
      *           *

```

**Figure S3:** Sanger sequencing result of *Fusarium* cob 5'Exon-3'Exon after *in vitro* cis-splicing and RT-PCR aligned with expected sequence.

On top, the expected 5'Exon-3'Exon sequence with forward and reverse primers used for RT-PCR in red and splice site in blue. Below, Sanger sequencing result using the reverse primer for amplification.

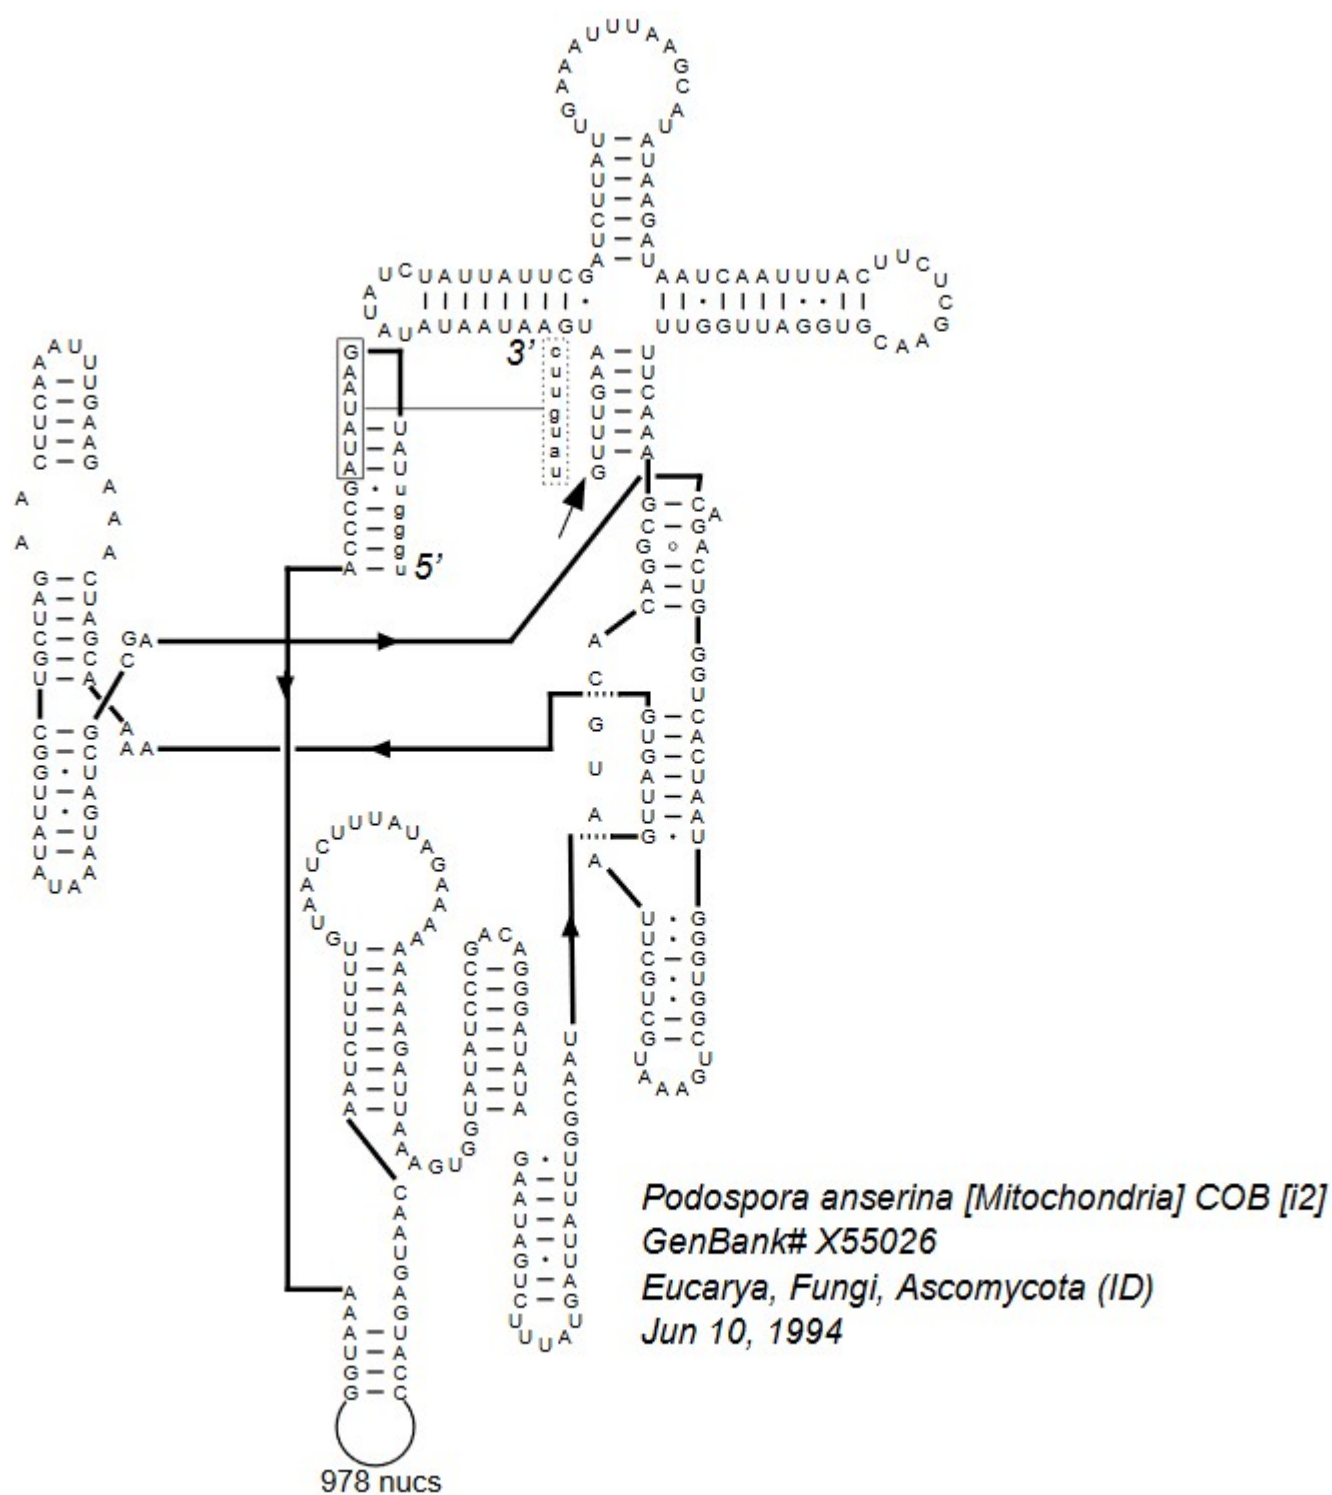

**Figure S4:** *Podospora anserina* cob secondary structure prediction from the Gutell Lab's Comparative RNA Website (<https://crw-site.chemistry.gatech.edu/>).

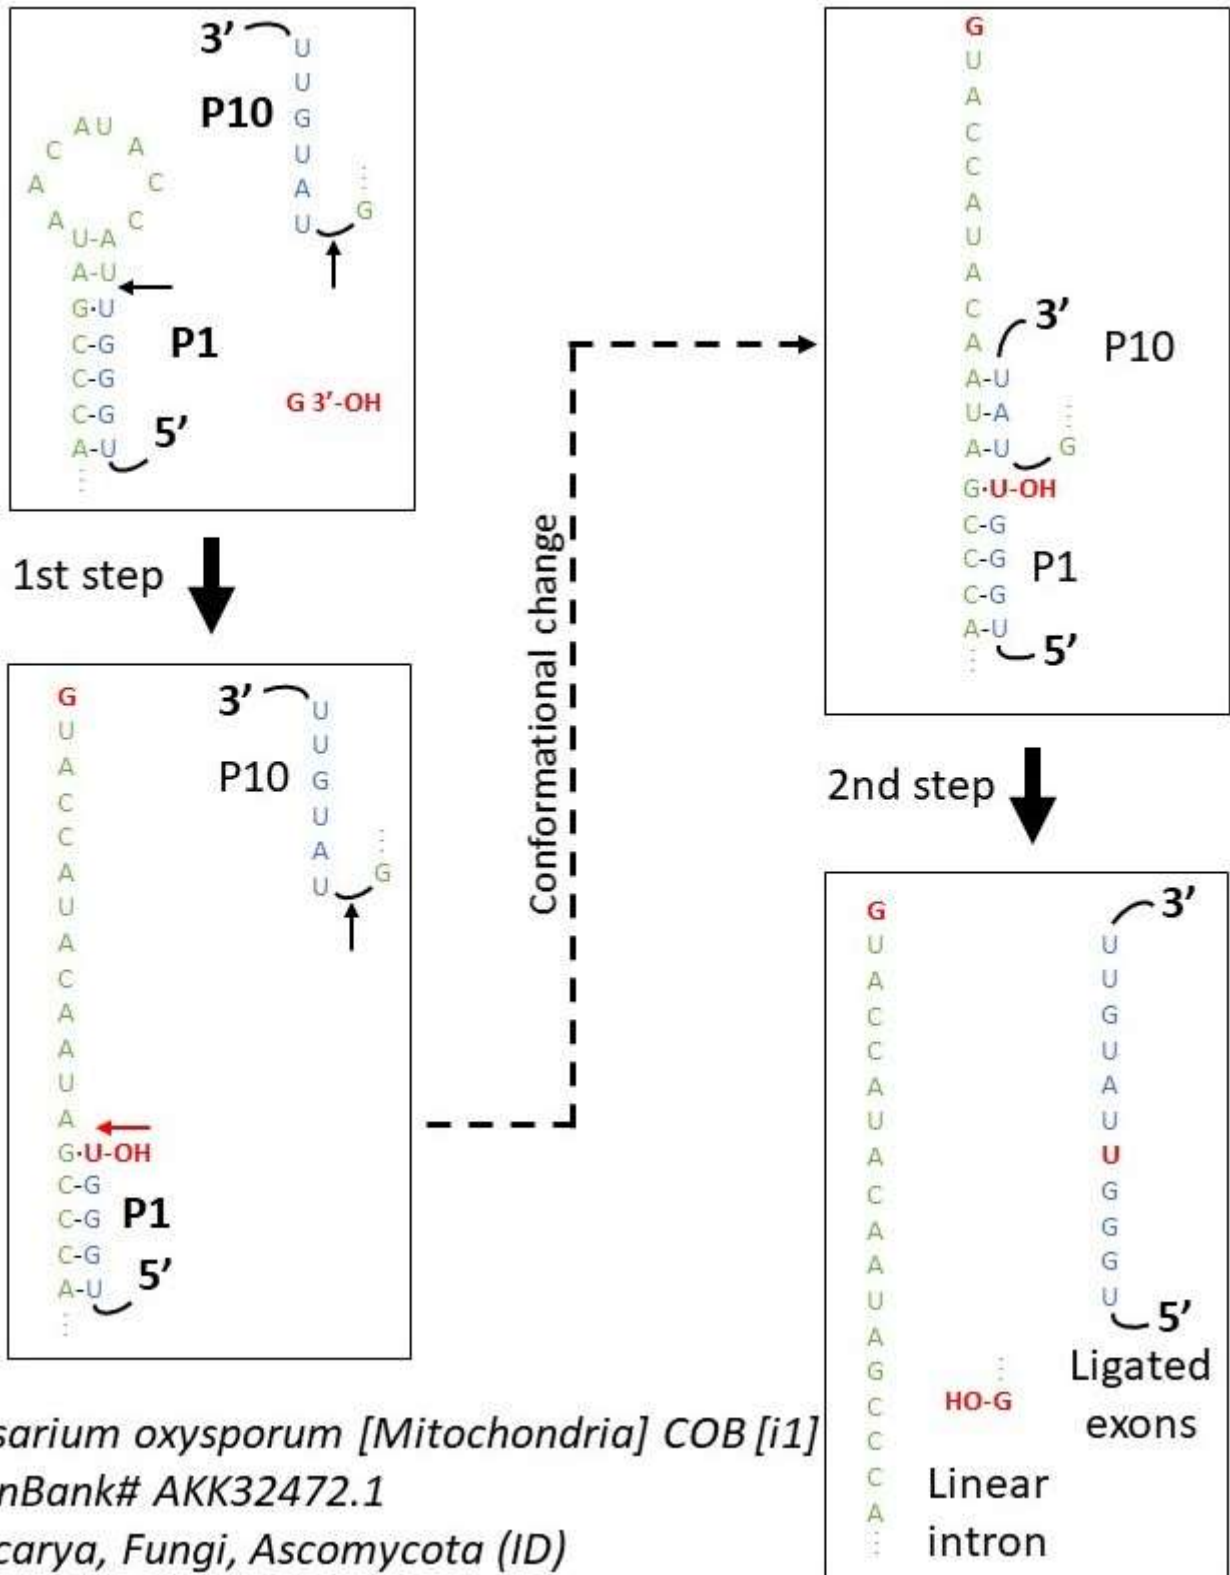

**Figure S5:** Putative splicing mechanism of *Fusarium cob* (1) intron (inspired from Vicens & Cech, 2006). The green sequence corresponds to the intron, the blue sequence to the exons, the red sequence to the guanosine co-factor and the black arrow to the splice sites.

1 gtgcatgcttctctgggTtatgttttaccttatggacaaatgtcattatgaggtgctacagttattactaatttaattagtgtgttctctgaattgga 99  
 53 gtgcatgcttctctgggTtatgttttaccttatggacaaatgtcattatgag-----t~~~ 1

**Figure S6:** Sanger sequencing result of *Fusarium* cob 5'Exon-3'Exon after *in vitro* trans-splicing and RT-PCR aligned with expected sequence.

On top, the expected 5'Exon-3'Exon sequence with forward and reverse primers used for RT-PCR in red and splice site in blue. An extra tail was added in 5' of the forward primer (5'-GTGCATGCG...) completed with a specific sequence stopping before the splice site to ensure specificity (...TTCCTGGGT-3'). Below, Sanger sequencing result using the reverse primer for amplification.

**A**

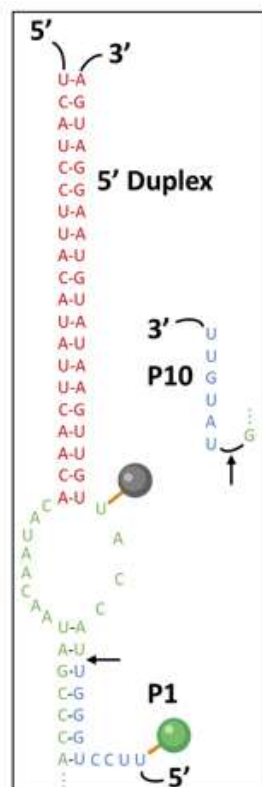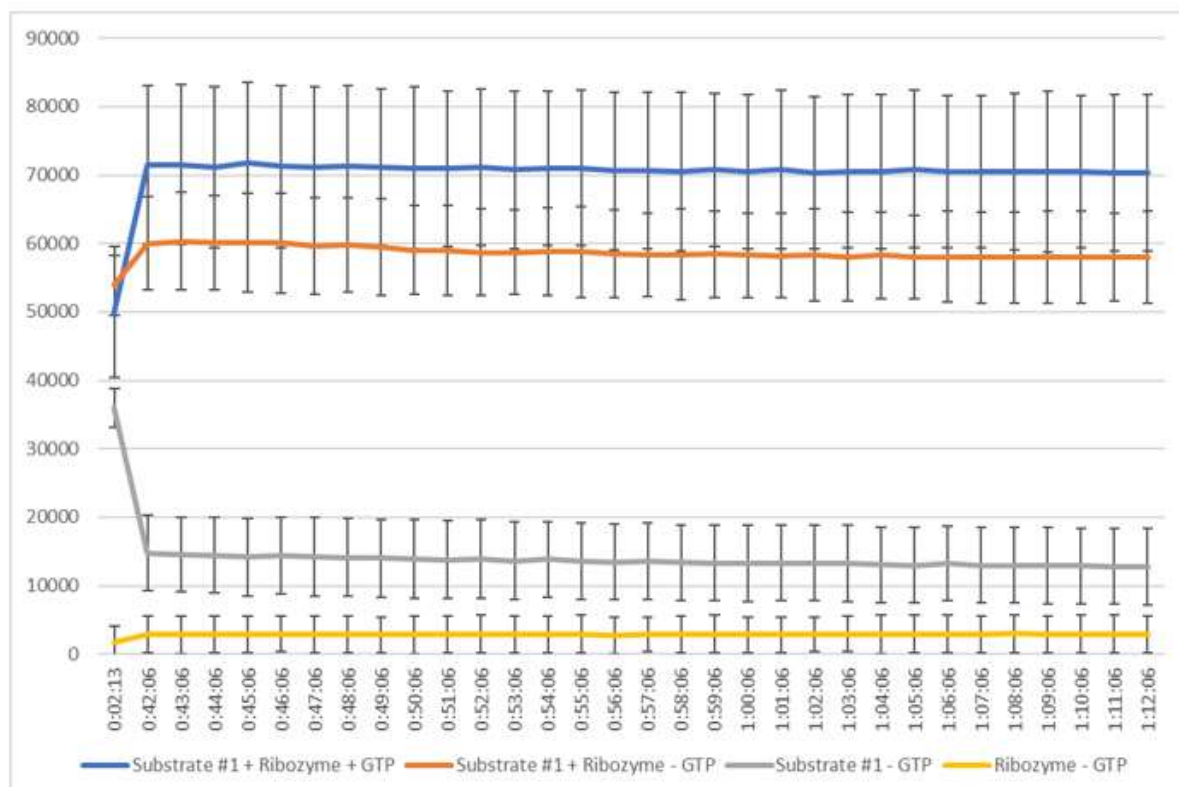



# B

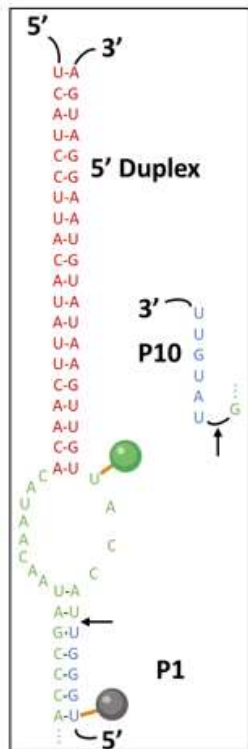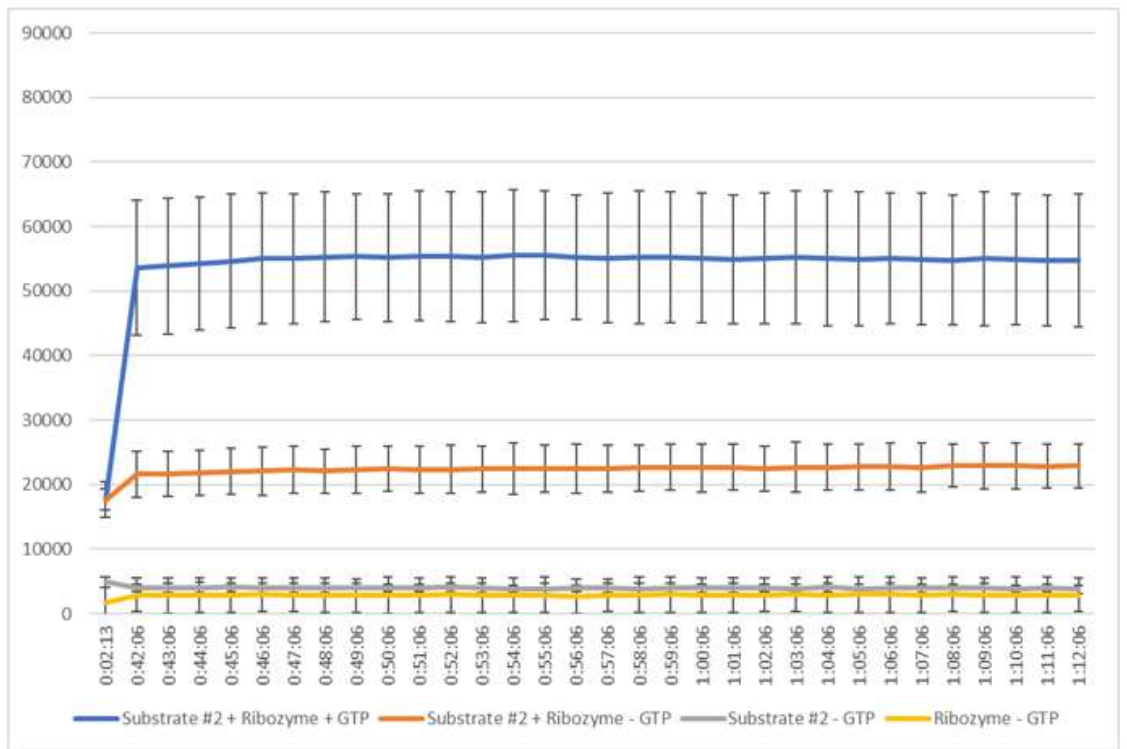

**C**

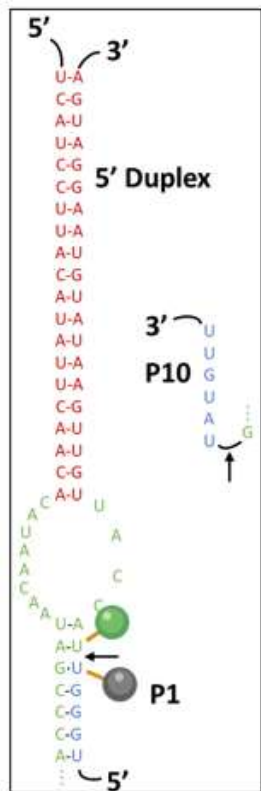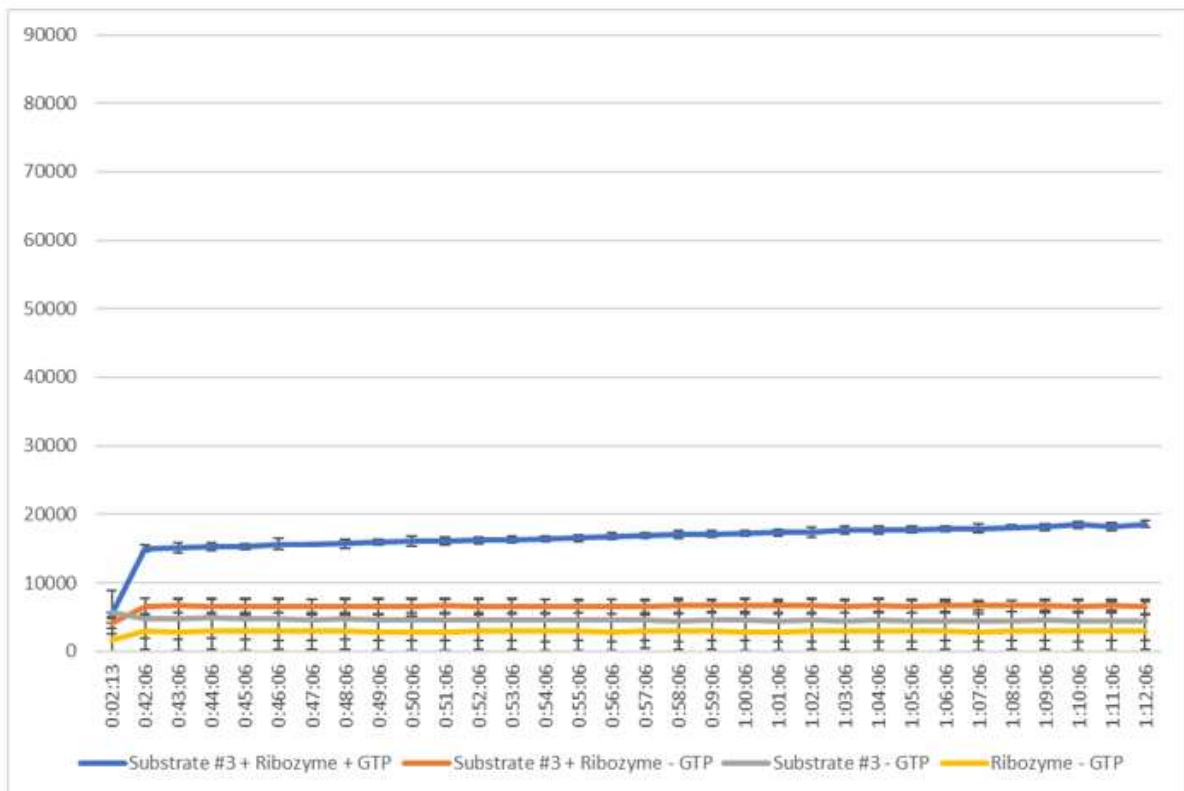

**Figure S7:** Comparison between fluorescent substrates used in this work. Blue line corresponds to a classical self-splicing reaction, composed of ribozyme, substrate, salts and GTP; orange line corresponds to the same reaction without GTP; grey line corresponds to substrate and salts and yellow line ribozyme and salts. (A) Substrate #1 is composed of a FAM fluorophore in green (maximum excitation: 495nm ; maximum emission: 515nm) and a DABdT quencher in grey (maximum absorbance: 475nm); (B) Substrate #2 and (C) #3 are composed of a 5' Iowa Black® Fluorescence Quencher in grey (maximum absorbance: 531nm) and an Internal-6-FAM fluorophore in green (maximum excitation: 495nm ; maximum emission: 515nm). All reactions were performed and monitored as described in "Materials and Methods". The black arrow corresponds to the splice site. Error bars correspond to standard deviation.



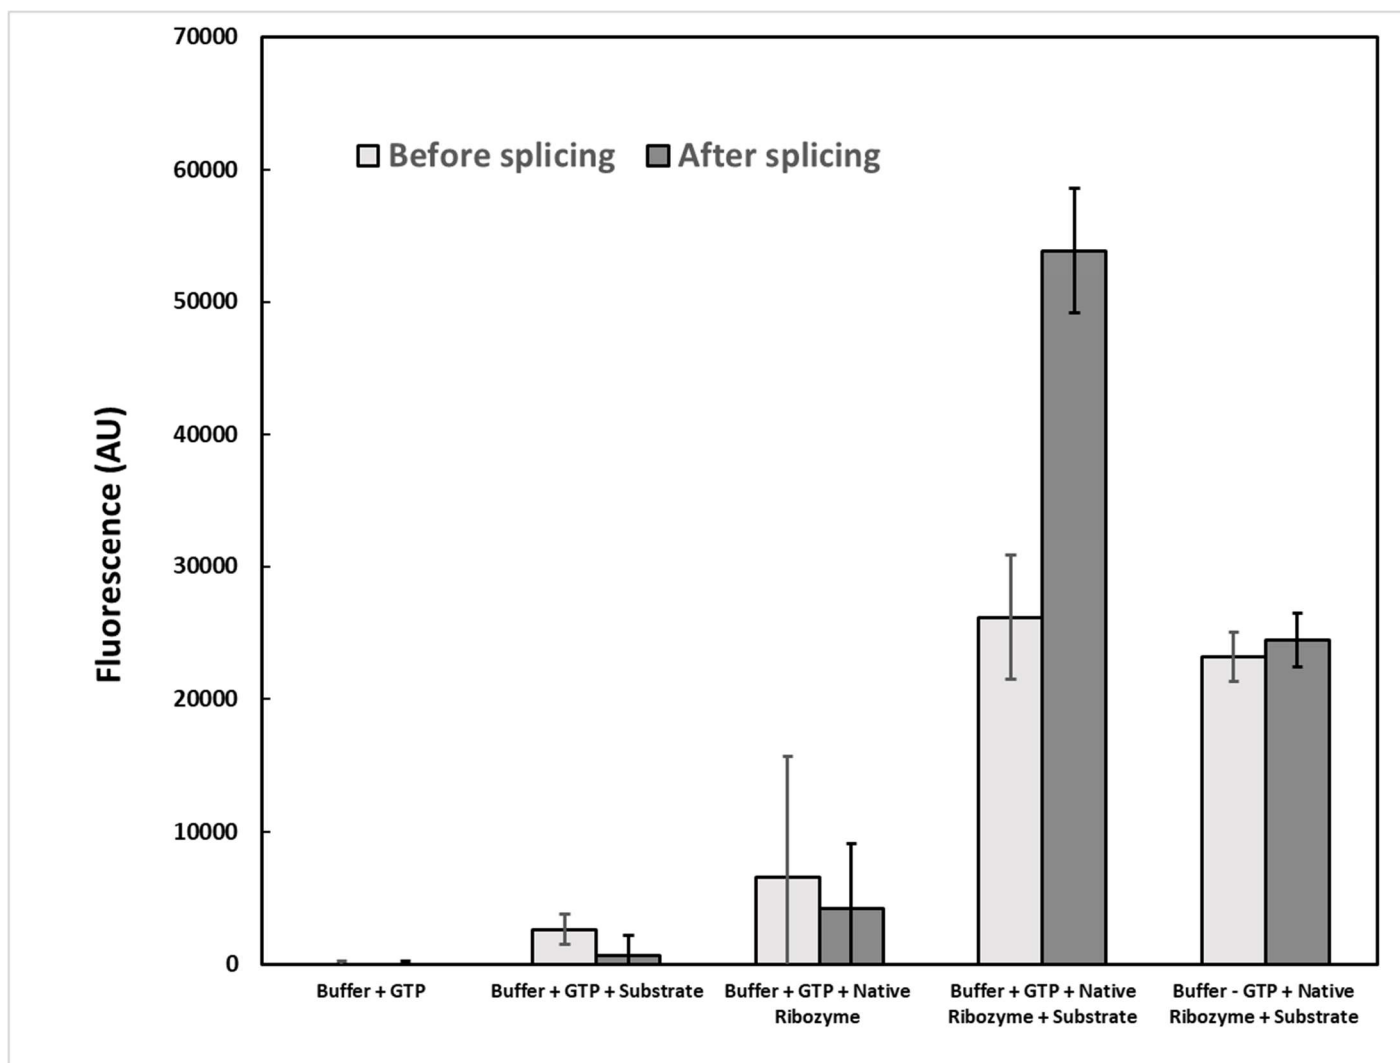

**Figure S8:** Fluorescence signal before (light grey) and after 1h at 37°C (dark grey). Fluorescence is only observed when the ribozyme and the substrate are co-incubated, with a twofold increase in signal under proper reaction conditions. Error bars correspond to standard deviation.

*Eucarya, Fungi, Ascomycota (ID)*

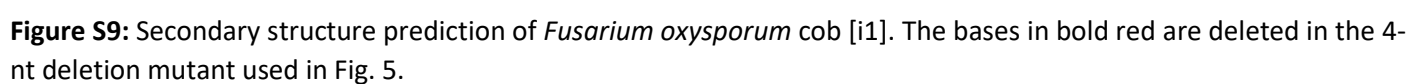

**Table S1:** List of fungal Group I introns tested in this work.

| Organism name                | Intron location | Gene <sup>1</sup> (position) | Subgroup <sup>2</sup> | Self-splicing activity <sup>3</sup> | Intron length (nt) | GC content (%) | Genome Genbank |
|------------------------------|-----------------|------------------------------|-----------------------|-------------------------------------|--------------------|----------------|----------------|
| <i>Botrytis cinerea</i>      | Mitochondrion   | cob (2)                      | ID                    | Not detected                        | 1358               | 28%            | KC832409.1     |
| <i>Botrytis cinerea</i>      | Mitochondrion   | cob (4)                      | IA                    | Partial <sup>4</sup>                | 1245               | 28%            | KC832409.1     |
| <i>Fusarium oxysporum</i>    | Mitochondrion   | cob (1)                      | ID                    | Detected                            | 1238               | 27%            | KR952337.1     |
| <i>Phakopsora pachyrhizi</i> | Mitochondrion   | cob (1)                      | ID                    | Partial <sup>4</sup>                | 1337               | 37%            | GQ332420.1     |
| <i>Phakopsora pachyrhizi</i> | Mitochondrion   | cox1 (1)                     | IB                    | Not detected                        | 1120               | 34%            | GQ332420.1     |
| <i>Phakopsora pachyrhizi</i> | Mitochondrion   | cox1 (2)                     | ID                    | Not detected                        | 935                | 36%            | GQ332420.1     |
| <i>Phakopsora pachyrhizi</i> | Nuclear         | rnl (1)                      | IB                    | Not detected                        | 366                | 38%            | GQ332420.1     |
| <i>Ustilago maydis</i>       | Mitochondrion   | cox1 (4)                     | ID                    | Not detected                        | 1397               | 33%            | DQ157700.1     |
| <i>Ustilago maydis</i>       | Mitochondrion   | cox1 (6)                     | IB                    | Not detected                        | 1349               | 31%            | DQ157700.1     |
| <i>Ustilago maydis</i>       | Mitochondrion   | cox1 (8)                     | IA                    | Not detected                        | 1208               | 39%            | DQ157700.1     |

<sup>1</sup>rnl: large subunit rRNA; cob: cytochrome b; cox1: cytochrome oxidase subunit 1

<sup>2</sup>Based on RNAWeasel predictions (Lang et al., 2007).

<sup>3</sup>Assessed with qRT-PCR and/or automated electrophoresis

<sup>4</sup>Correspond to the first step of the self-splicing reaction

**Table S2:** List of primers used for T7 PCR amplification.

Underlined sequences correspond to T7 promoter.

| Organism name                | Gene type (position) | Forward primer (5' -> 3')                            | Reverse primer (5' -> 3')           |
|------------------------------|----------------------|------------------------------------------------------|-------------------------------------|
| <i>Botrytis cinerea</i>      | cob (2)              | <u>TAATACGACTCACTATAG</u> GGCGAGTAACACAGCTTCAGC      | CTCACAGTGACATTTGCC                  |
| <i>Botrytis cinerea</i>      | cob (4)              | <u>TAATACGACTCACTATAG</u> GGTTATTACAAATCTTATGAGTGCTG | GGTTACCAGAACCTGCACTATC              |
| <i>Fusarium oxysporum</i>    | cob (1)              | <u>TAATACGACTCACTATAG</u> TCTTAATAGAGACCAAGAAC       | TCCAATTCAAGGAACAGCACTA              |
| <i>Phakopsora pachyrhizi</i> | cob (1)              | <u>TAATACGACTCACTATAG</u> GGCGATTGGAGTAATTATTC       | TCTATTAGAGTCGCATTACTTACACTGAAACCC   |
| <i>Phakopsora pachyrhizi</i> | cox1 (1)             | <u>TAATACGACTCACTATAG</u> GGTTTGACTGCTATGCCCG        | ATCCCCGCTAGATGTAGAGAAAAAATTACACAATC |
| <i>Phakopsora pachyrhizi</i> | cox1 (2)             | <u>TAATACGACTCACTATAG</u> GGTAACAGACAGGAATTCAAC      | ACTGCCTTACCACTAACTG                 |
| <i>Phakopsora pachyrhizi</i> | rnl (1)              | <u>TAATACGACTCACTATAG</u> GGTATAAAGTGTTTTAGG         | ACTAGCATACATGTTAAGACAGCTAGAGCATC    |
| <i>Ustilago maydis</i>       | cox1 (4)             | <u>TAATACGACTCACTATAG</u> GGGACTCCTTAGAGCTTTTGTTAC   | TGTTTTTGAGAATAGGTGTTGATAAAG         |
| <i>Ustilago maydis</i>       | cox1 (6)             | <u>TAATACGACTCACTATAG</u> GGCAGGTAAACCAGTATTTG       | GTAGGAACAGCAATAATCATTGTAGCAGC       |
| <i>Ustilago maydis</i>       | cox1 (8)             | <u>TAATACGACTCACTATAG</u> GGAAACCATCTACCTATCTCG      | TGCAGTAGCACTACAGATACTAG             |

**Table S3:** List of primers used for qRT-PCR.

| Organism name                | Gene type (position) | Name | Sequence (5' -> 3')       |
|------------------------------|----------------------|------|---------------------------|
| <i>Fusarium oxysporum</i>    | cob (1)              | F1   | GCACCAAGAACATTGACATGAGT   |
| <i>Fusarium oxysporum</i>    | cob (1)              | R1   | ACGTGAGAACGAAGTCTCCT      |
| <i>Fusarium oxysporum</i>    | cob (1)              | F2   | AGTTGTAGTCCTGCGAGTATAAAG  |
| <i>Fusarium oxysporum</i>    | cob (1)              | R2   | GACCCAGTCTGTCGCGATTA      |
| <i>Fusarium oxysporum</i>    | cob (1)              | F3   | ACTAATGGGTGGCTGAAATGC     |
| <i>Fusarium oxysporum</i>    | cob (1)              | R3   | TCCAATTCAAGGAACAGCACTA    |
| <i>Botrytis cinerea</i>      | cob (4)              | F1   | TGAGTGCTGTACCATGAATTGGA   |
| <i>Botrytis cinerea</i>      | cob (4)              | R1   | ACCTATTAGAGGTAGCATCGTTAAA |
| <i>Botrytis cinerea</i>      | cob (4)              | F2   | GAGTGGGGTTTACAATGGCT      |
| <i>Botrytis cinerea</i>      | cob (4)              | R2   | ACTCTTTGTACGTCGGCCTT      |
| <i>Botrytis cinerea</i>      | cob (4)              | F3   | CTCGACACGAATGCCCTACA      |
| <i>Botrytis cinerea</i>      | cob (4)              | R3   | AAGCCGCTAAAACGAAAGGT      |
| <i>Phakopsora pachyrhizi</i> | cob (1)              | F1   | AGCGACAGCGTTTATAGGTT      |
| <i>Phakopsora pachyrhizi</i> | cob (1)              | R1   | ACTGCATGTGAGGCGGTC        |
| <i>Phakopsora pachyrhizi</i> | cob (1)              | F2   | TTTGCTTTTCTCAAGCCGGG      |
| <i>Phakopsora pachyrhizi</i> | cob (1)              | R2   | TAGCGATCACTCACCCCTCT      |
| <i>Phakopsora pachyrhizi</i> | cob (1)              | F3   | CAGGGTCATGTATTGGGGGC      |
| <i>Phakopsora pachyrhizi</i> | cob (1)              | R3   | TCCAATTCAGGGAATCGCACT     |
